# Supplementary material for: The IRE1/XBP1 signaling axis promotes skeletal muscle regeneration through a cell non-autonomous mechanism
Source: eLife journal article supplement (doi:10.7554/elife.73215), 2021-11-23
Supplement: supp [file Source data-Revised Submission eLife.xlsx]

## Sheet: Figure 1D
Average myofiber CSA 5dpi
Ern1 fl/fl	Ern1cKO		Unpaired t test
752.775	482.662		P value	0.0014
781.282	403.113		P value summary	**
565.041	383.787		Significantly different (P < 0.05)?	Yes
580.923	446.328		One- or two-tailed P value?	Two-tailed
879.879	449.977		t, df	t=3.845, df=16
410.864	304.166
901.295	653.705
751.593	537.561
917.159	548.537

## Sheet: Figure 1E
Minimal Feret's Diameter 5dpi
Ern1 fl/fl	Ern1cKO		Unpaired t test
21.0702	15.7826		P value	0.0038
19.1369	17.3019		P value summary	**
20.192	20.3358		Significantly different (P < 0.05)?	Yes
25.1896	20.0495		One- or two-tailed P value?	Two-tailed
26.086	18.9771		t, df	t=3.579, df=12
22.425	17.354
22.64
26.1

## Sheet: Figure 1F
Average myofiber CSA 14 dpi
Ern1 fl/fl	Ern1cKO		Unpaired t test
2486.19	2216.81		P value	0.031
3283.58	2036.92		P value summary	*
2841.42	2012.53		Significantly different (P < 0.05)?	Yes
			One- or two-tailed P value?	Two-tailed
			t, df	t=3.264, df=4

## Sheet: Figure 1G
Myofiber containing 2 or more nuclei (percentage)
Day 5			Day 14
Ern1 fl/fl	Ern1cKO		Ern1 fl/fl	Ern1cKO
28.1319	17.3145		26.6169	18.3838
36.0825	12.9707		26.4766	15.6118
20.7407	9.33786		35.1974	10.5405
17.0845	15.6965
			Unpaired t test
Unpaired t test			P value	0.0167
P value	0.0427		P value summary	*
P value summary	*		Significantly different (P < 0.05)?	Yes
Significantly different (P < 0.05)?	Yes		One- or two-tailed P value?	Two-tailed
One- or two-tailed P value?	Two-tailed		t, df	t=3.956, df=4
t, df	t=2.564, df=6

## Sheet: Figure 1I
Average CSA (post Double injury)
	Ern1 fl/fl	Ern1cKO
	1558.9	582.11
	1456.1	456.35
	1012.3	410
			Unpaired t test
			P value	0.008
			P value summary	**
			Significantly different (P < 0.05)?	Yes
			One- or two-tailed P value?	Two-tailed
			t, df	t=4.900, df=4

## Sheet: Figure 1J
Myofiber containing 2 or more nuclei percentage (post Double injury)
Ern1 fl/fl	Ern1cKO
62.5899	21.659
43.7811	9.41704
42.8571	27.6151
		Unpaired t test
		P value	0.0226
		P value summary	*
		Significantly different (P < 0.05)?	Yes
		One- or two-tailed P value?	Two-tailed
		t, df	t=3.606, df=4

## Sheet: Figure 2B
Percent relative frequency of eMyHC+ laminin+ myofibers
	Bin Center	Ern1 fl/fl	Ern1cKO
	0	0	0.204082
	100	3.05344	5.10204
	200	3.05344	15.7143
	300	5.49618	17.3469
	400	9.77099	21.2245
	500	12.9771	18.5714
	600	15.7252	11.0204
	700	13.2824	4.69388
	800	10.9924	3.06122
	900	10.229	1.22449
	1000	5.34351	1.02041
	1100	3.81679	0.612245
	1200	3.66412	0.204082
	1300	1.98473	0
	1400	0.305344	0
	1500	0.305344	0

## Sheet: Figure 2C
Percent eMyHC+ myofibers with 2 or more nuclei
Ern1 fl/fl	Ern1cKO		Unpaired t test
27.4678	16.8966		P value	0.0227
32.7869	12.9346		P value summary	*
17.5732	9.18197		Significantly different (P < 0.05)?	Yes
15.6626	15.8621		One- or two-tailed P value?	Two-tailed
	14.7826		t, df	t=2.813, df=8
	9.10736

## Sheet: Figure 2D
Relative Myf5 mRNA levels
Uninjured		Injured
Ern1 fl/fl	Ern1cKO	Ern1 fl/fl	Ern1cKO
1.09	0.5	10.37	5.82
0.94	1.84	10.09	4.62
0.98	0.9	7.26	5.03
		6.72	4.22
			4.84
ANOVA summary
F	39.29
P value	<0.0001
P value summary	****
Significant diff. among means (P < 0.05)?	Yes
				Summary	Adjusted P Value
Tukey's multiple comparisons test	Mean Diff.	95.00% CI of diff.	Below threshold?	ns	0.9998	A-B
Column A vs. Column B	-0.07667	-2.753 to 2.600	No	****	<0.0001	A-C
Column A vs. Column C	-7.607	-10.11 to -5.103	Yes	**	0.0022	A-D
Column A vs. Column D	-3.903	-6.296 to -1.509	Yes	****	<0.0001	B-C
Column B vs. Column C	-7.53	-10.03 to -5.027	Yes	**	0.0026	B-D
Column B vs. Column D	-3.826	-6.220 to -1.432	Yes	**	0.0017	C-D
Column C vs. Column D	3.704	1.505 to 5.903	Yes

## Sheet: Figure 2E
Relative MyoD1 mRNA levels
Uninjured		Injured
Ern1 fl/fl	Ern1cKO	Ern1 fl/fl	Ern1cKO
1.11	0.65	1.89	1.14
0.93	1.37	2.43	1.59
0.97	0.84	1.98	1.55
		1.8	1.77
			1.36
ANOVA summary
F	12.78
P value	0.0007
P value summary	***
Significant diff. among means (P < 0.05)?	Yes
ANOVA table	SS	DF	MS	F (DFn, DFd)	P value
Treatment (between columns)	2.657	3	0.8857	F (3, 11) = 12.78	P=0.0007
Residual (within columns)	0.7623	11	0.0693
Total	3.419	14
Data summary
Number of treatments (columns)	4
Number of values (total)	15
Number of families	1
Number of comparisons per family	6
Alpha	0.05
Tukey's multiple comparisons test	Mean Diff.	95.00% CI of diff.	Below threshold?	Summary	Adjusted P Value
Column A vs. Column B	0.05	-0.5969 to 0.6969	No	ns	0.9953	A-B
Column A vs. Column C	-1.022	-1.627 to -0.4166	Yes	**	0.0017	A-C
Column A vs. Column D	-0.4787	-1.057 to 0.09992	No	ns	0.1168	A-D
Column B vs. Column C	-1.072	-1.677 to -0.4666	Yes	**	0.0012	B-C
Column B vs. Column D	-0.5287	-1.107 to 0.04992	No	ns	0.0768	B-D
Column C vs. Column D	0.543	0.01153 to 1.074	Yes	*	0.0449	C-D

[truncated: 43 more sheets: Figure 2F, Figure 2G, Figure 3B, Figure 3C, Figure 3F, Figure 4B, Figure 4C, Figure 4D, Figure 4F, Figure 4G, Figure 4H, Figure 4I, Figure 4J, Figure 4K, Figure 5B, Figure 5C, Figure 5D, Figure 5E, Figure 5F, Figure 5H …]
