# Supplementary figures and images for: The IRE1/XBP1 signaling axis promotes skeletal muscle regeneration through a cell non-autonomous mechanism
Source: eLife journal article supplement (doi:10.7554/elife.73215), 2021-11-23

**Figure 1—figure supplement 1**

**A.**

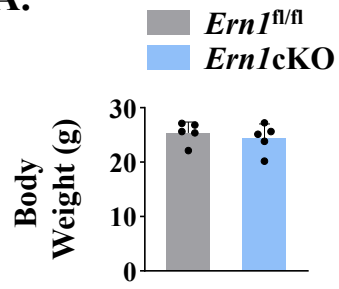

**B.**

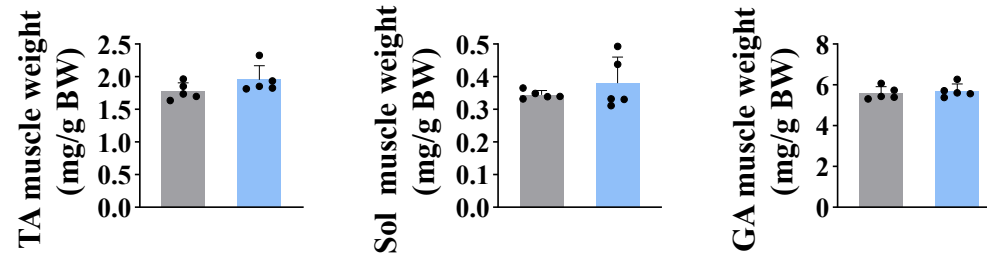

**C.**

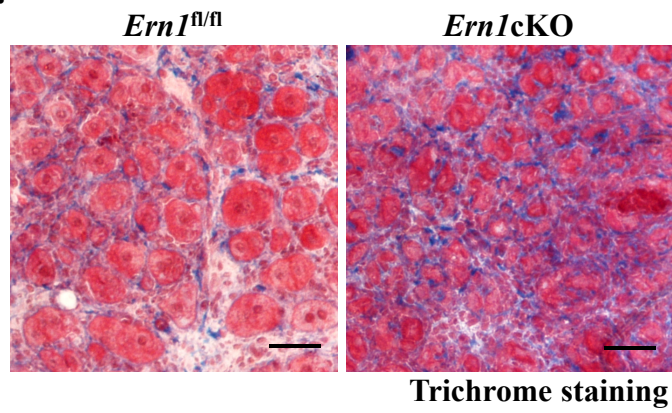

Supplement: supp [file elife_poa_e73215_Figure_1_figure_supplement_1.pdf › elife_poa_e73215_Figure_1_figure_supplement_1.pdf]

**Figure 4-figure supplement 1**

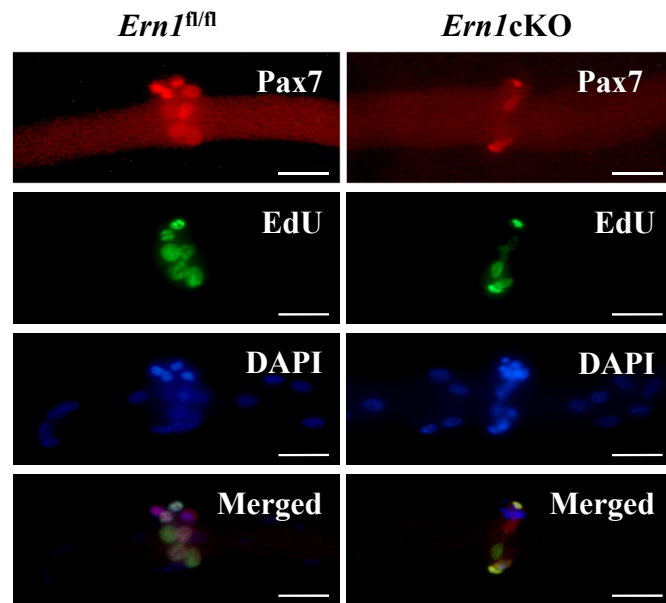

Supplement: supp [file elife_poa_e73215_Figure_4_figure_supplement_1.pdf › elife_poa_e73215_Figure_4_figure_supplement_1.pdf]

**Figure 5-figure supplement 1**

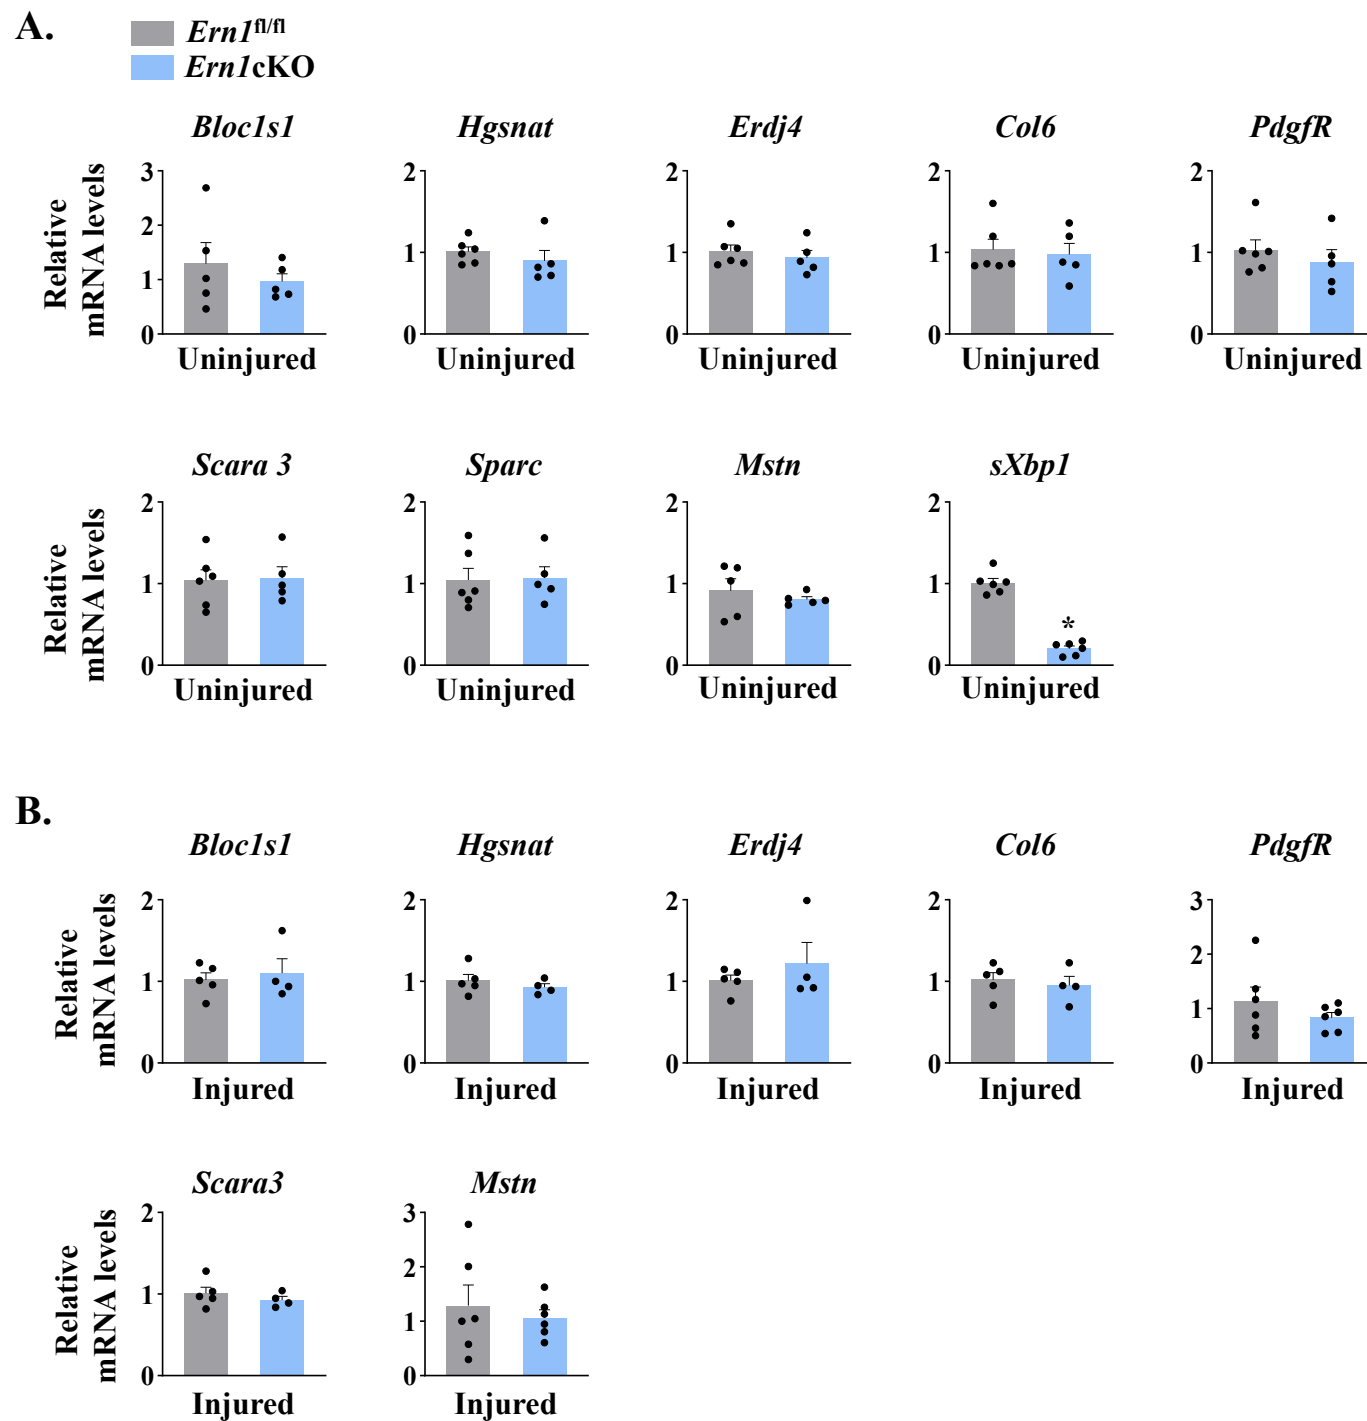

Supplement: supp [file elife_poa_e73215_Figure_5_figure_supplement_1.pdf › elife_poa_e73215_Figure_5_figure_supplement_1.pdf]

**Figure 6-figure supplement 1**

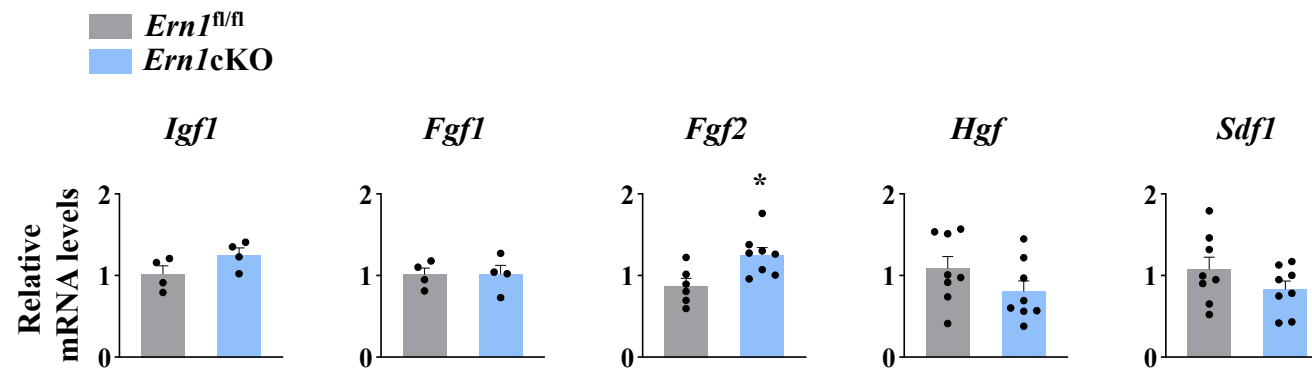

Supplement: supp [file elife_poa_e73215_Figure_6_figure_supplement_1.pdf › elife_poa_e73215_Figure_6_figure_supplement_1.pdf]

Figure 8-figure supplement 1

A.

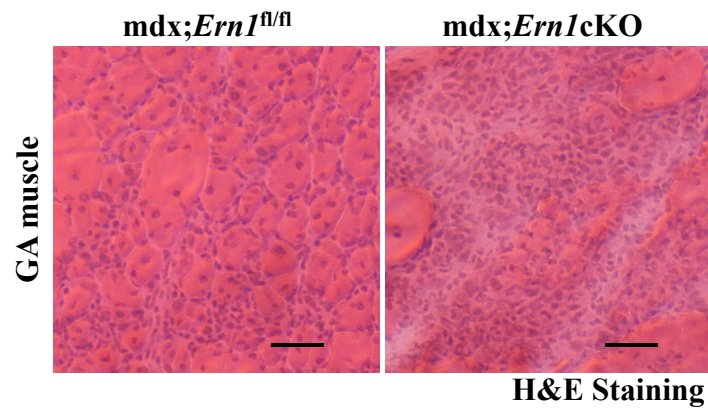

B.

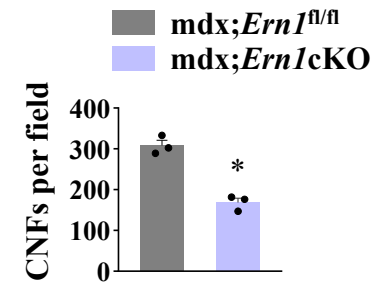

C.

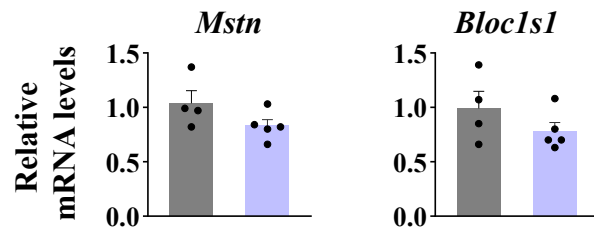

D.

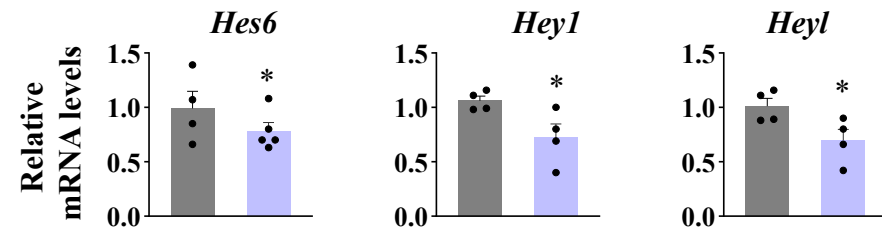

Supplement: supp [file elife_poa_e73215_Figure_8_figure_supplement_1.pdf › elife_poa_e73215_Figure_8_figure_supplement_1.pdf]
